# Supplementary material for: Characterization of Changes and Driver Microbes in Gut Microbiota During Healthy Aging Using A Captive Monkey Model
Source: PubMed Central journal article supplement (PMC9684162; doi:10.1016/j.gpb.2021.09.009), 2021-12-30

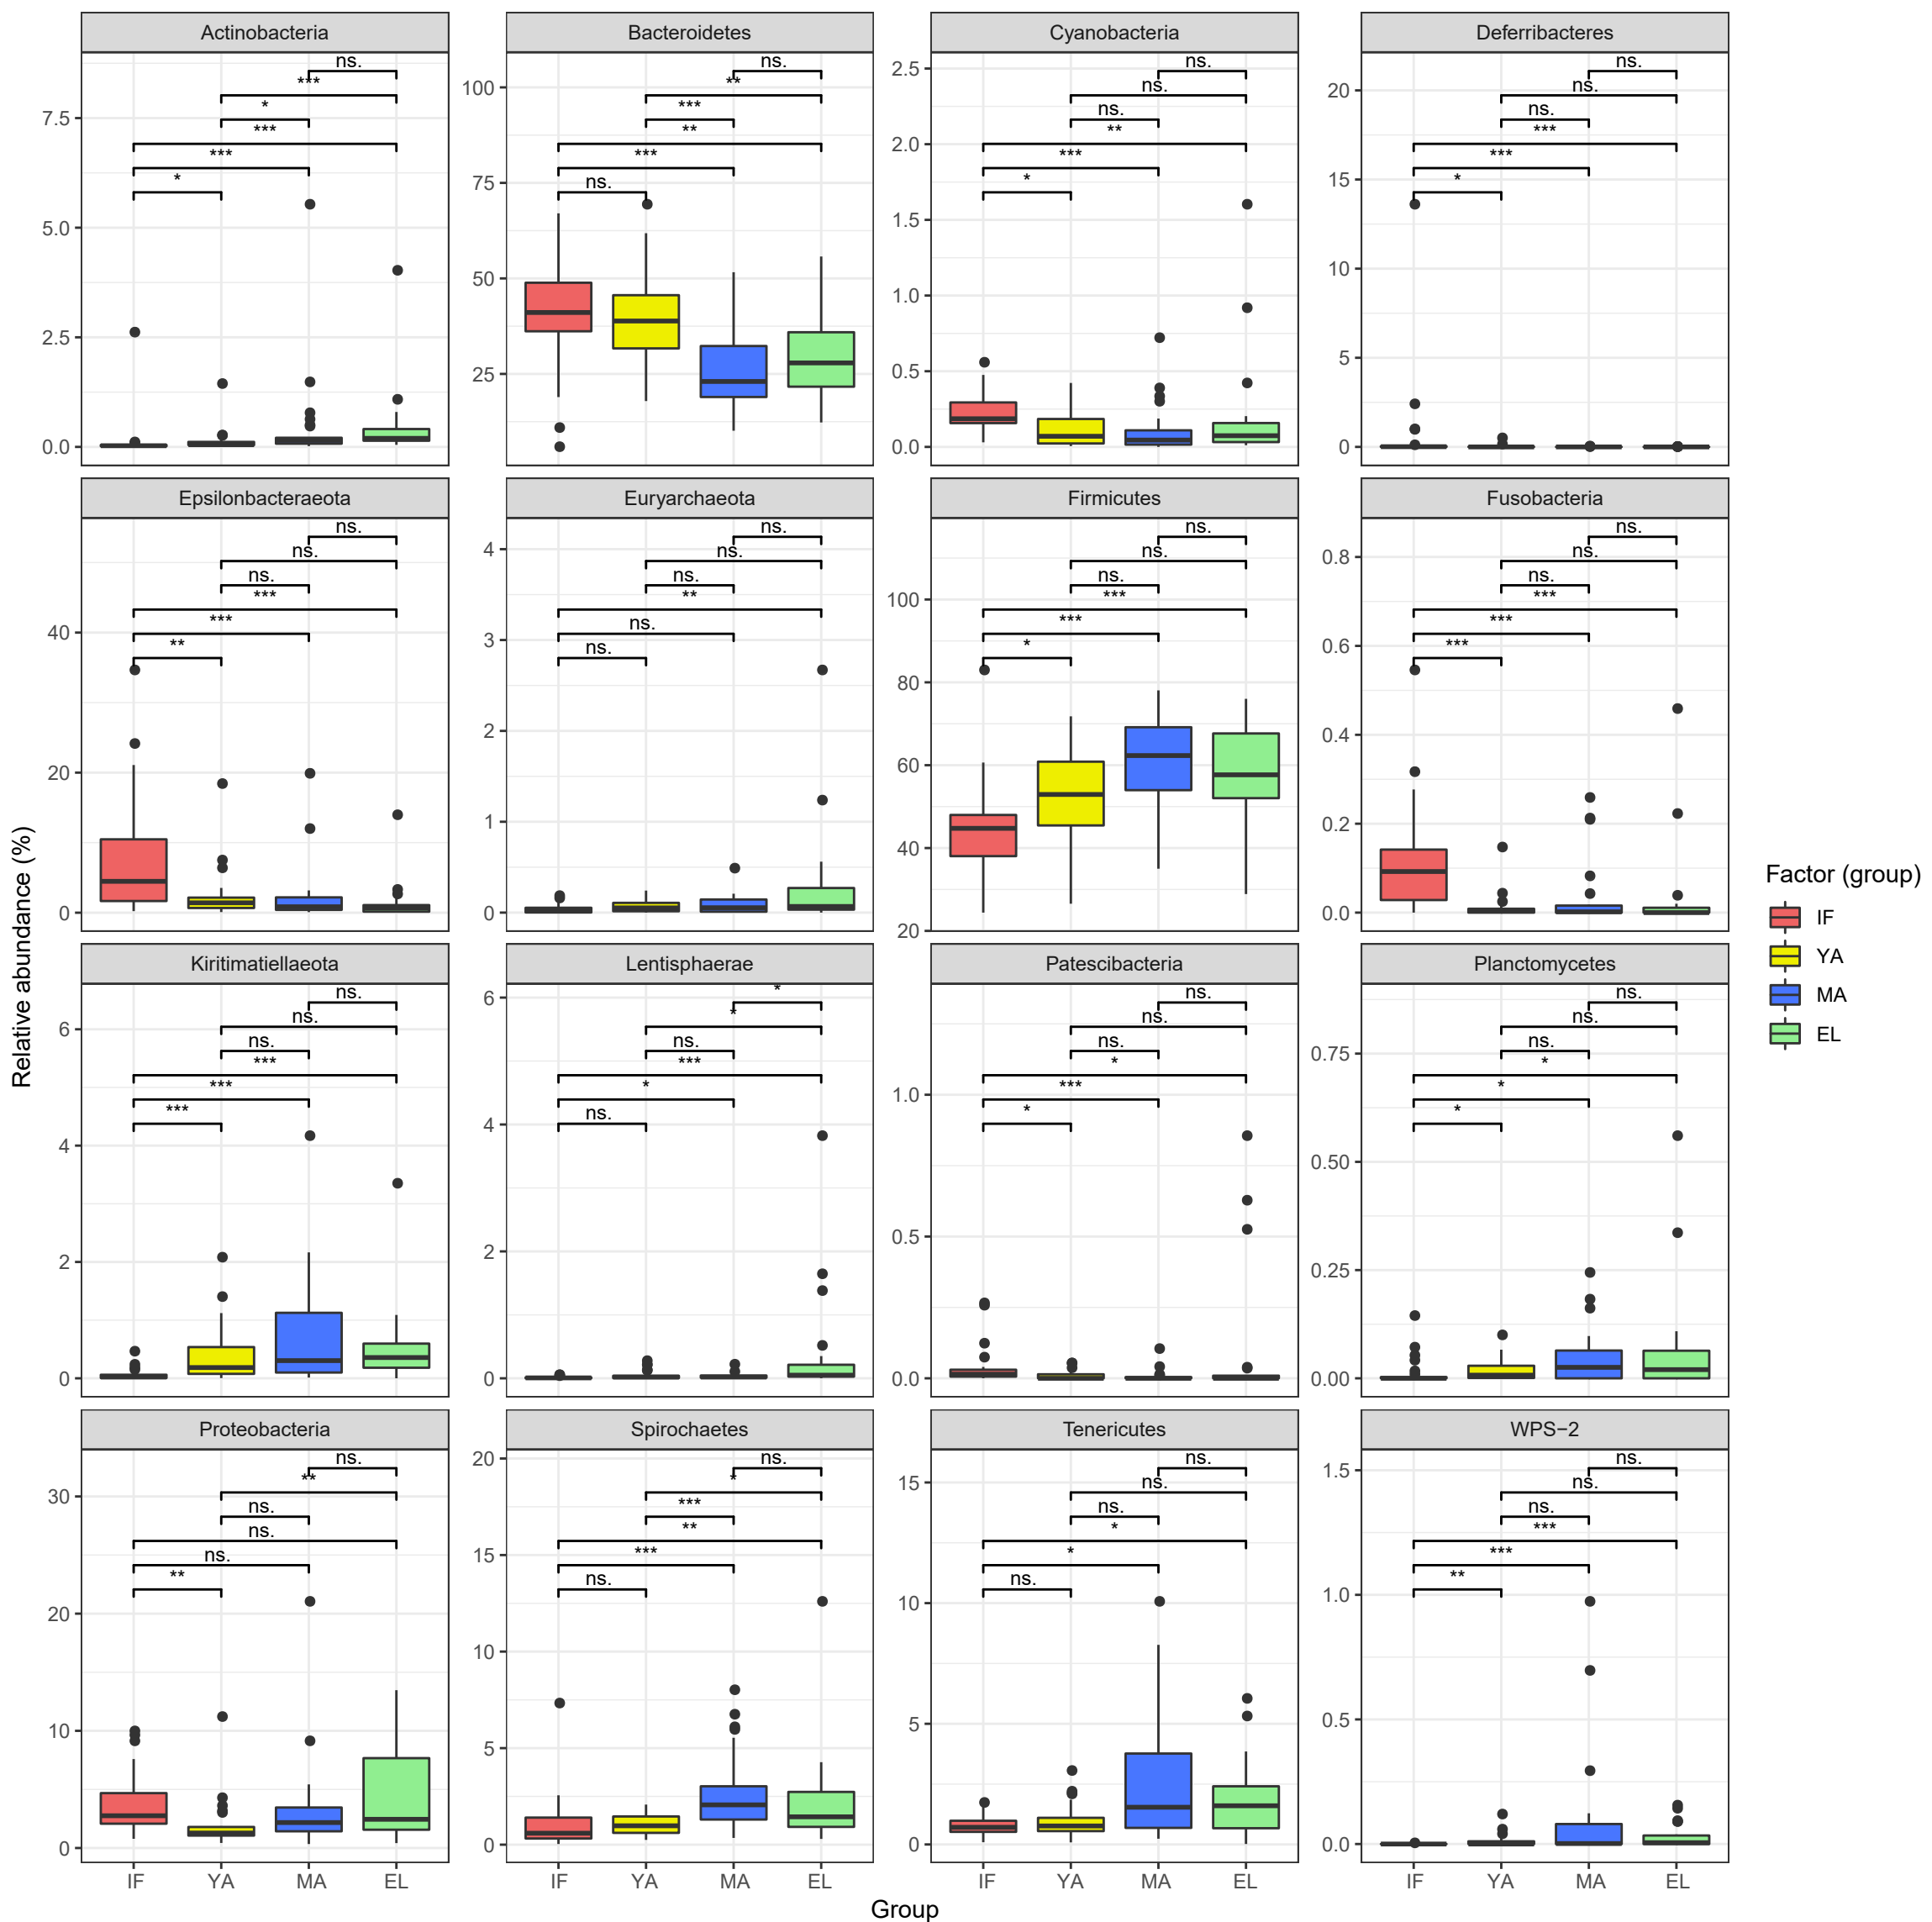

Supplement: mmc3.pdf [file mmc3.pdf]
