# Supplementary material for: Characterization of Changes and Driver Microbes in Gut Microbiota During Healthy Aging Using A Captive Monkey Model
Source: PubMed Central journal article supplement (PMC9684162; doi:10.1016/j.gpb.2021.09.009), 2021-12-30
Supplement: mmc10.pdf [file mmc10.pdf]

报告编号: No. A2193481

报告共 5 页

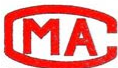

2016191225Z

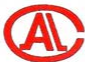

2019(粵)质监认字204号

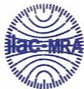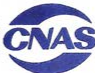

中国认可  
国际互认  
检测  
TESTING  
CNAS L3276

# 检验报告

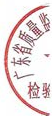

受检单位: 广州相观生物科技有限公司

样品名称: 猴

检验级别: 普通级

检验类别: 监督

广东省实验动物监测所  
广东省质量监督实验动物检验站

广东省实验动物监测所  
广东省质量监督实验动物检验站  
检 验 报 告

|      |                                                                                                      |         |              |
|------|------------------------------------------------------------------------------------------------------|---------|--------------|
| 样品名称 | 猴                                                                                                    | 品种/品系   | 食蟹猴          |
| 等级   | 普通级                                                                                                  | 抽(送)样表号 | 2019643      |
| 受检单位 | 广州相观生物科技有限公司                                                                                         | 检验类别    | 监督           |
| 委托单位 | 广东省科学技术厅                                                                                             | 样品数量    | 20只          |
| 抽样地点 | 广州市从化鳌头镇横坑村<br>菱角队自编104号首层6栋                                                                         | 抽样基数    | 4000只        |
| 来样方式 | 抽样                                                                                                   | 抽(送)样日期 | 2019-12-01   |
| 样品编号 | A2019348                                                                                             | 样品状态描述  | 皮毛、皮屑、肛拭子、血液 |
| 样本编号 | A2019348-1~A2019348-20                                                                               |         |              |
| 检验依据 | GB 14922.1-2001《实验动物 寄生虫学等级及监测》、GB 14922.2-2011《实验动物 微生物学等级及监测》                                      |         |              |
| 检验结论 | <p>本次检验结果符合GB 14922.1-2001《实验动物 寄生虫学等级及监测》、GB 14922.2-2011《实验动物 微生物学等级及监测》标准中普通级动物质量的指标要求, 检验合格。</p> |         |              |
| 备注   | /                                                                                                    |         |              |

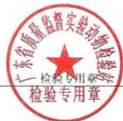

编制人: 刘佳乐

验核人: 冯凡贵

签发人: 张钰

日期: 2019年12月17日

日期: 2019年12月17日

日期: 2019年12月23日

(一) 督实  
★  
: 专 (一)

**广东省实验动物监测所**  
**广东省质量监督实验动物检验站**  
**检    验    报    告**

|           |              |              |              |              |              |
|-----------|--------------|--------------|--------------|--------------|--------------|
| 样本编号      | A2019348-1   | A2019348-2   | A2019348-3   | A2019348-4   | A2019348-5   |
| 对应受检单位自编号 | /            | /            | /            | /            | /            |
| 样本状态描述    | 皮毛、皮屑、肛拭子、血液 | 皮毛、皮屑、肛拭子、血液 | 皮毛、皮屑、肛拭子、血液 | 皮毛、皮屑、肛拭子、血液 | 皮毛、皮屑、肛拭子、血液 |
| 样本编号      | A2019348-6   | A2019348-7   | A2019348-8   | A2019348-9   | A2019348-10  |
| 对应受检单位自编号 | /            | /            | /            | /            | /            |
| 样本状态描述    | 皮毛、皮屑、肛拭子、血液 | 皮毛、皮屑、肛拭子、血液 | 皮毛、皮屑、肛拭子、血液 | 皮毛、皮屑、肛拭子、血液 | 皮毛、皮屑、肛拭子、血液 |
| 样本编号      | A2019348-11  | A2019348-12  | A2019348-13  | A2019348-14  | A2019348-15  |
| 对应受检单位自编号 | /            | /            | /            | /            | /            |
| 样本状态描述    | 皮毛、皮屑、肛拭子、血液 | 皮毛、皮屑、肛拭子、血液 | 皮毛、皮屑、肛拭子、血液 | 皮毛、皮屑、肛拭子、血液 | 皮毛、皮屑、肛拭子、血液 |
| 样本编号      | A2019348-16  | A2019348-17  | A2019348-18  | A2019348-19  | A2019348-20  |
| 对应受检单位自编号 | /            | /            | /            | /            | /            |
| 样本状态描述    | 皮毛、皮屑、肛拭子、血液 | 皮毛、皮屑、肛拭子、血液 | 皮毛、皮屑、肛拭子、血液 | 皮毛、皮屑、肛拭子、血液 | 皮毛、皮屑、肛拭子、血液 |

广东省实验动物监测所  
广东省质量监督实验动物检验站  
病原菌检验报告单

样品编号: A2019348

受检样品: 皮屑, 肛拭子

| 检验项目   | 检验方法               | 标准要求 | 检验结果 | 评价 |
|--------|--------------------|------|------|----|
| 沙门菌    | GB/T 14926.1-2001  | 排除   | 阴性   | 合格 |
| 皮肤病原真菌 | GB/T14926.4-2001   | 排除   | 阴性   | 合格 |
| 志贺菌    | GB/T 14926.47-2008 | 排除   | 阴性   | 合格 |

检测日期: 2019 年 12 月 04 日 至 2019 年 12 月 18 日

广东省实验动物监测所  
广东省质量监督实验动物检验站  
病毒检验报告单

样品编号: A2019348

受检样品: 血清

| 检验项目             | 检验方法                          | 标准要求 | 检验结果 | 评价 |
|------------------|-------------------------------|------|------|----|
| 猕猴疱疹病毒1型<br>(BV) | GB/T 14926.60-2001<br>(ELISA) | 排除   | 抗体阴性 | 合格 |

检测日期: 2019年12月04日至2019年12月06日

## 广东省实验动物监测所

## 广东省质量监督实验动物检验站

## 寄生虫检验报告单

样品编号: A2019348

受检样品: 毛皮, 血清

| 检验项目             | 检验方法              | 标准要求 | 检验结果 | 评价 |
|------------------|-------------------|------|------|----|
| 体外寄生虫            | GB/T 18448.1-2001 | 排除   | 阴性   | 合格 |
| 弓形虫(抗体)<br>(IHA) | GB/T 18448.2-2008 | 排除   | 阴性   | 合格 |

检测日期: 2019年12月04日至2019年12月06日
